# Supplementary material
Source: Springer Nature journal article supplement (https://www.springermedizin.de/resource/supplementary/13075_2013_4209_MOESM3_ESM.pdf/9696324)

**Supplementary Figure 2. A. PCA scatter plot revealed separation when the first 20 principal components only were taken into account. Rings denote the different categories; young; 1, old; 2 or OA; 3. B. DF1 and DF2 scores revealed a similar separation.**

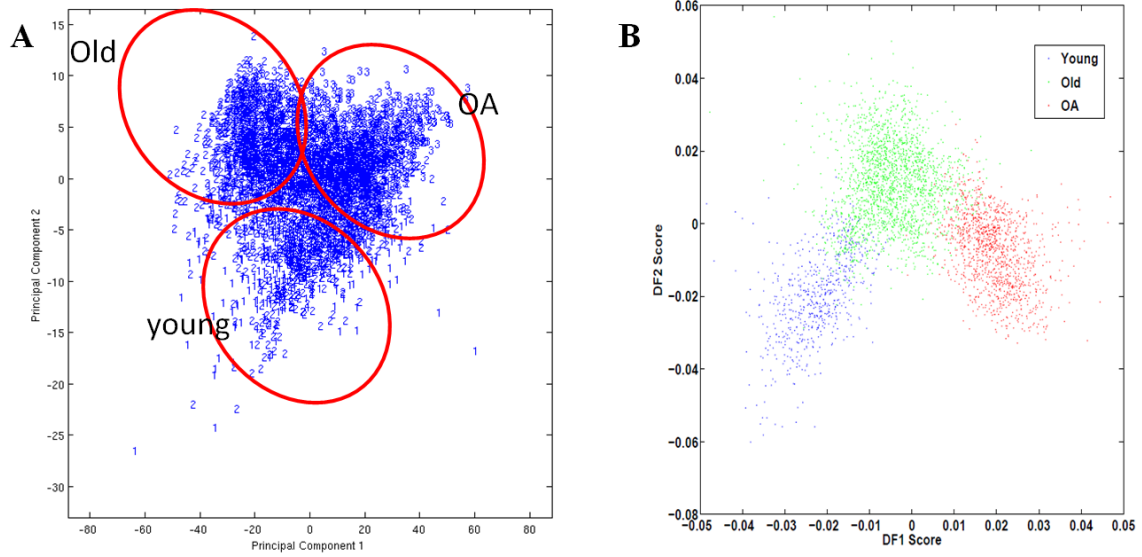

Supplement: MOESM3 [file 9696324]
